# Supplementary material
Source: MDPI journal article supplement (https://www.mdpi.com/2073-4441/14/23/3900)
Supplement: s1 [file s1]

# Reconstruction of Urban Rainfall Measurements to Estimate the Spatio-Temporal Variability of Extreme Rainfall

Risma Joseph, P. P. Mujumdar and Rajarshi Das Bhowmik \*

Interdisciplinary Centre for Water Research, Indian Institute of Science, Bangalore 560012, India

\* Correspondence: rajarshidb@iisc.ac.in; Tel.: +91-080-2293-3224

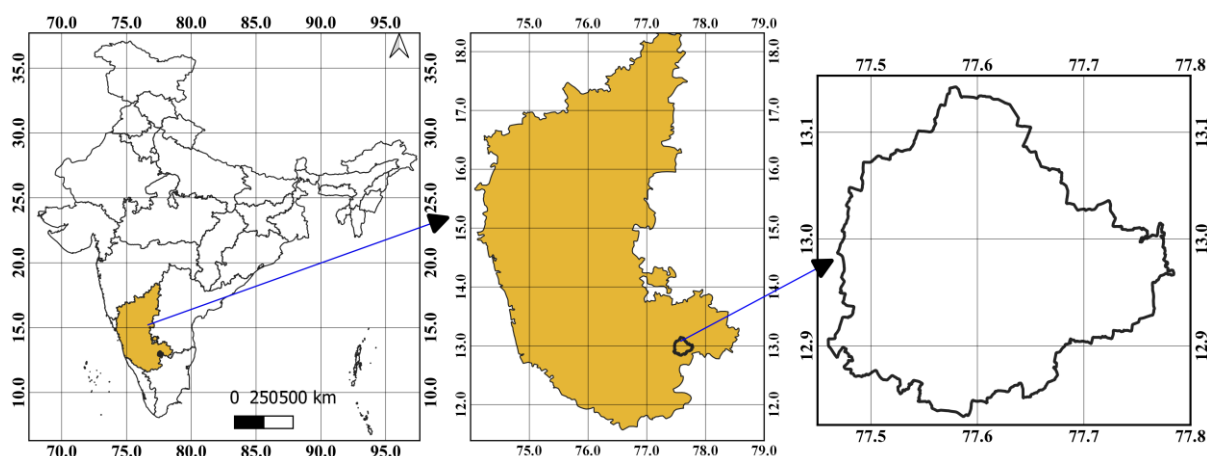

Figure S1. Location of Bangalore city.

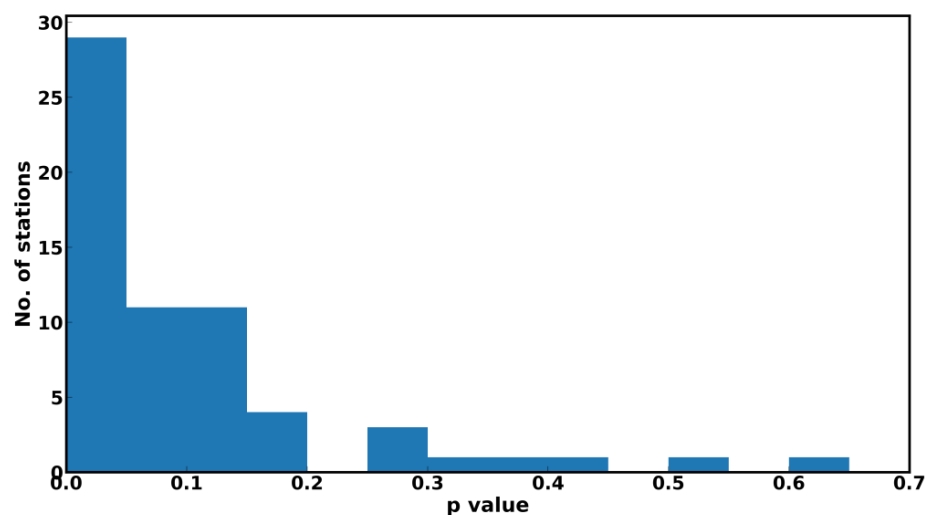

Figure S2. Histogram showing number of stations with respective p value.

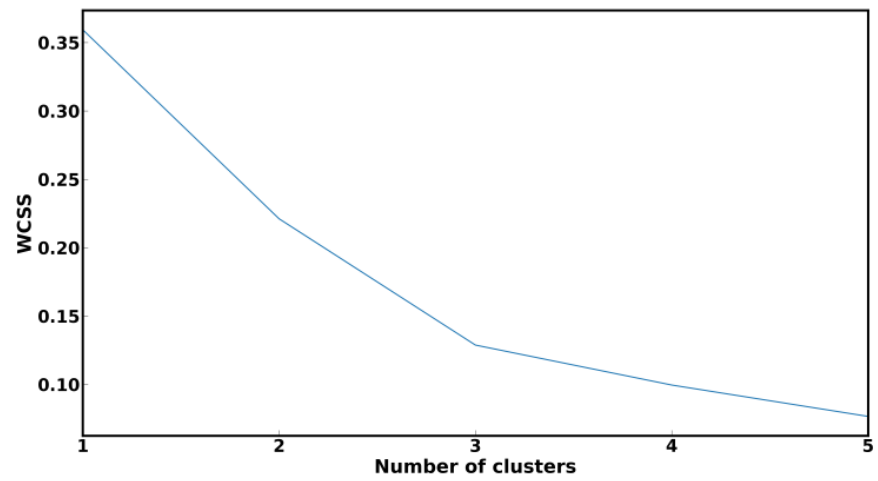

**Figure S3.** Elbow curve, where  $k=3$  is chosen.

**Table S1.** Correlation between model predicted extremes and observed extremes for thirty KSNDMC stations. Extreme rainfalls are estimated using a point over threshold approach. 95<sup>th</sup> percentile of sub-daily rainfall is considered as the threshold.

| Sl No | corr | Station Number |
|-------|------|----------------|
| 0     | 0.63 | 1018           |
| 1     | 0.70 | 1024           |
| 2     | 0.68 | 1031           |
| 3     | 0.72 | 1035           |
| 4     | 0.75 | 1050           |
| 5     | 0.65 | 2300           |
| 6     | 0.76 | 2301           |
| 7     | 0.72 | 2302           |
| 8     | 0.73 | 2303           |
| 9     | 0.83 | 2304           |
| 10    | 0.79 | 2305           |
| 11    | 0.69 | 2306           |
| 12    | 0.75 | 2307           |
| 13    | 0.73 | 2308           |
| 14    | 0.74 | 2309           |
| 15    | 0.70 | 2310           |
| 16    | 0.72 | 2314           |
| 17    | 0.73 | 2315           |
| 18    | 0.77 | 2316           |
| 19    | 0.67 | 2317           |
| 20    | 0.76 | 2318           |
| 21    | 0.68 | 2323           |
| 22    | 0.71 | 2364           |
| 23    | 0.67 | 2365           |
| 24    | 0.73 | 680            |
| 25    | 0.74 | 684            |
| 26    | 0.69 | 801            |
| 27    | 0.67 | 890            |
| 28    | 0.67 | 99             |

**Table S2.** Number of stations under each zones.

| <b>Zone</b> | <b>No. of stations</b> |
|-------------|------------------------|
| 1           | 15                     |
| 2           | 17                     |
| 3           | 20                     |
